# Supplementary material for: Biodegradable polyurethane non-tackifier pressure-sensitive adhesive derived from cashew nut shells
Source: Royal Society of Chemistry journal article supplement (doi:10.1039/d5gc05627f), 2025-12-18

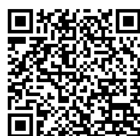

# TEST REPORT

1. NO : CT25-092758E

2. Client

○ Name : Inha University Research and Business Foundation

○ Address : 100, Inha-ro, Michuhol-gu, Incheon, Republic of Korea

3. Date of Test : 2025.11.03 ~ 2025.11.20

4. Use of Report : -

5. Test Sample : Poly(Glutaric anhydride-alt-Cardanol glycidylether) (PGC)

6. Test Method

(1) ASTM D6866-24

7. Test Results

1) Poly(Glutaric anhydride-alt-Cardanol glycidylether) (PGC)

| Test Item(s)               | Unit | Test Method | Test Results | Remark | Loc. |
|----------------------------|------|-------------|--------------|--------|------|
| Bio-based carbon content   | %    | (1)         | 71           | -      | A    |
| pMC(percent Modern Carbon) | %    | (1)         | 70.42 ± 0.71 |        |      |

※ Location

A : 27, Gaetbeol-ro, Yeonsu-gu, Incheon, Republic of Korea

|                                                                                                                                                                                                                                                                                                                                                                                                                                                                                                                                                              |                                                         |                                                      |
|--------------------------------------------------------------------------------------------------------------------------------------------------------------------------------------------------------------------------------------------------------------------------------------------------------------------------------------------------------------------------------------------------------------------------------------------------------------------------------------------------------------------------------------------------------------|---------------------------------------------------------|------------------------------------------------------|
| Affirmation                                                                                                                                                                                                                                                                                                                                                                                                                                                                                                                                                  | Tested By<br>Name : Changhoon Han <i>han chang hoon</i> | Technical Manager<br>Name : JUNG CHOL HOO <i>정철후</i> |
| This report is not accredited by KOLAS and KS Q ISO/IEC 17025.<br>Our report apply only to the standards or procedures identified and to the sample(s) tested unless otherwise specified. The test results are not indicative of representative of the qualities of the lot from which the sample was taken or of apparently identical or similar products. The results of using only a portion of this report cannot be guaranteed. The authenticity of this test report can be checked on KCL website( <a href="http://www.kcl.re.kr">www.kcl.re.kr</a> ). |                                                         |                                                      |

2025.11.20

Korea Conformity Laboratories

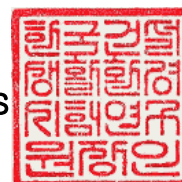

Result Inquiry : INU innovation center 4th floor 7-43, Songdo-dong, Yeonsu-gu, Incheon, Korea (82-32-460-5129)

※ 본 성적서는 전자문서지갑으로 발급된 디지털문서입니다.

※ 진위여부는 모바일 전용 앱 [전자문서지갑(디지털문서 유통)] 을 통한 우측의 QR코드 스캔 또는  
전자문서지갑([wallet.utradehub.or.kr/kcl](http://wallet.utradehub.or.kr/kcl))에서 확인할 수 있습니다.

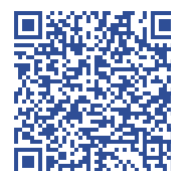

# TEST REPORT

No: CT25-092758E

## ■ Test results

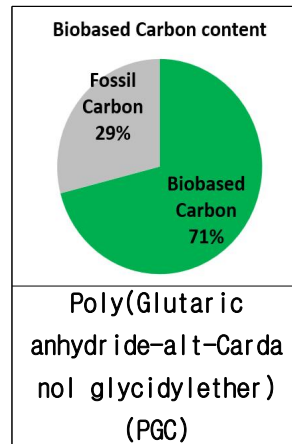

## ■ Bio-carbon content measurement

Bio-carbon content (%) was measured using Method B (AMS) of the standard ASTM D6866-24, and the measurement precision quoted according to the standard is  $\pm 3\%$  (absolute value), and the precision of radiocarbon isotope content is  $\pm 1\sigma$  (relative standard deviation).

percent Modern Carbon (pMC) is a value measured using an acceleration mass spectrometer, and the sample was graphitized using IONPLUS's AGE3 (graphitizer) for pretreatment of the sample.

The atmospheric correction factor was applied at 99.4 pMC, which is the value corresponding to 2025 in ASTM D6866-24, and when the biocarbon content exceeded 100%, it was calculated according to (22.7 ~ 22.9).

Biocarbon content is calculated based on TC (Total Carbon).

- end of report -

- Page 2 of 2 -

양식TQP-12-01-03(1)

※ 본 성적서는 전자문서지갑으로 발급된 디지털문서입니다.  
※ 진위여부는 모바일 전용 앱 [전자문서지갑(디지털문서 유통)] 을 통한 우측의 QR코드 스캔 또는 전자문서지갑(wallet.utradehub.or.kr/kcl)에서 확인할 수 있습니다.

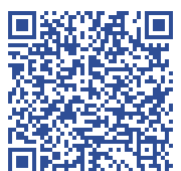

Supplement: d5gc05627f2.pdf [file d5gc05627f2.pdf]
